# Supplementary material for: Neuronal hyperactivity–induced oxidant stress promotes in vivo α-synuclein brain spreading
Source: PubMed Central journal article supplement (PMC9432848; doi:10.1126/sciadv.abn0356), 2022-08-31
Supplement: sciadv.abn0356_sm.pdf [file sciadv.abn0356_sm.pdf]

Supplementary Materials for  
**Neuronal hyperactivity–induced oxidant stress promotes in vivo  $\alpha$ -synuclein  
brain spreading**

Michael Helwig *et al.*

Corresponding author: Donato A. Di Monte, donato.dimonte@dzne.de

*Sci. Adv.* **8**, eabn0356 (2022)  
DOI: 10.1126/sciadv.abn0356

**The PDF file includes:**

Figs. S1 and S2

Data S1

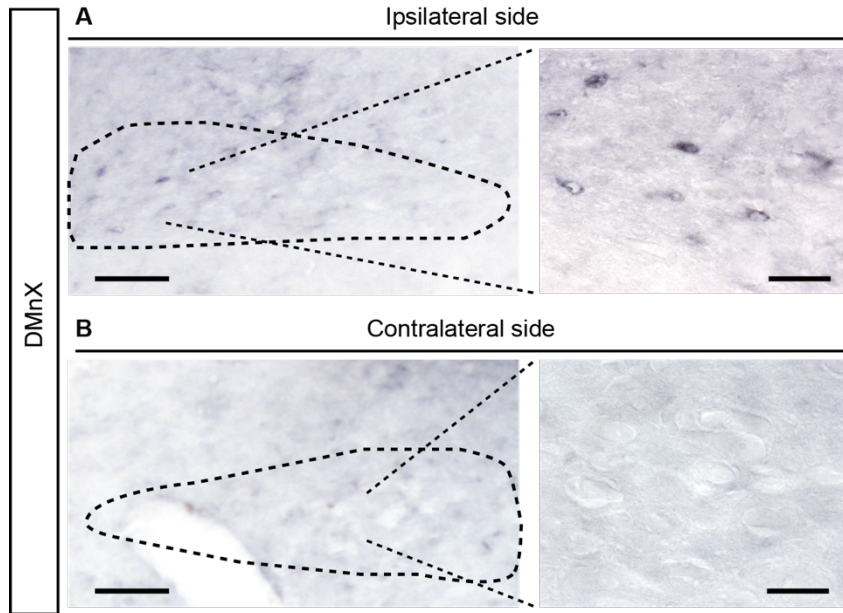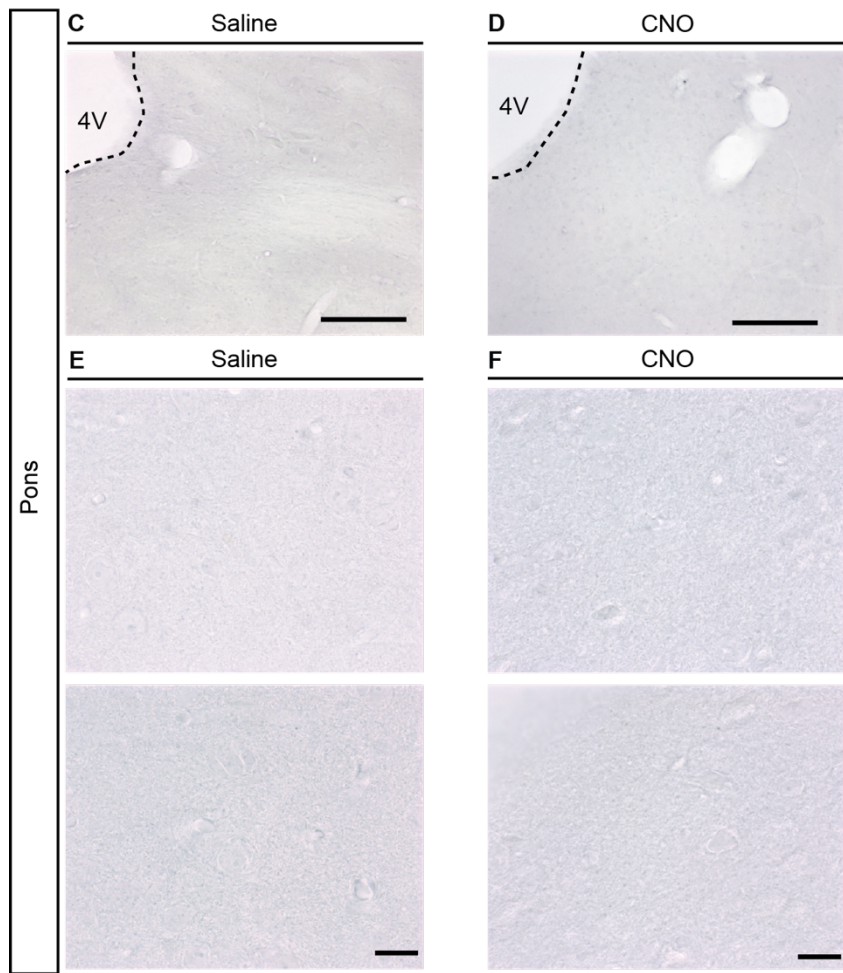

**Fig. S1. Selective detection of Cre-recombinase protein in the DMnX.** (A-F) iR26-aS mice received an intravagal injection of Cre-AAVs together with hM3D<sub>fl</sub>-AAVs and were sacrificed five weeks later. They were also treated with daily intraperitoneal injections of either saline or CNO for two weeks prior to sacrifice. Tissue sections from the MO (A and B) and pons (C-F) were immunostained with anti-Cre and processed for brightfield microscopy. (A and B) Representative sections of the dorsal MO show the presence of immunoreactive neurons in the left (ipsilateral to the vagal AAV injection, A) but not the right (contralateral to the AAV injection, B) DMnX (delineated with dashed lines). Images were collected at low (left panels) and higher (right panels) magnification. Scale bars, 50 and 20  $\mu\text{m}$  in the left and right panels, respectively. (C-F) Representative sections of the left pons at low (C and D) and higher (E and F) magnification from either saline- (C and E) or CNO- (D and F) treated mice show lack of Cre protein immunoreactivity. The 4<sup>th</sup> ventricle (4V) is delineated with dashed lines in C and D. Scale bars, 200  $\mu\text{m}$  in C and D, and 20  $\mu\text{m}$  in E and F.

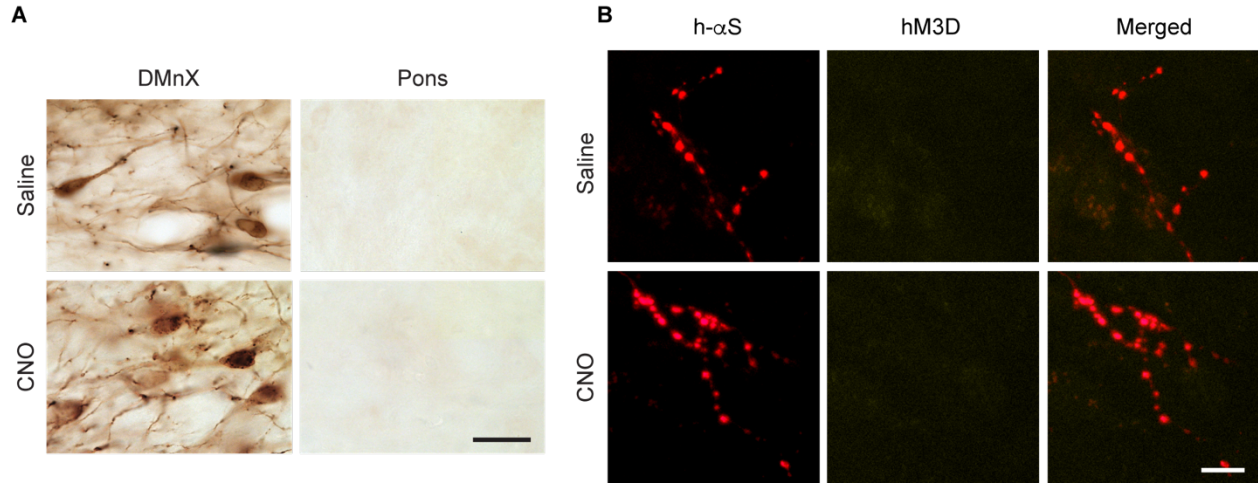

**Fig. S2. Selective detection of mCherry-fused hM3D protein in the dorsal MO.** (A and B) iR26- $\alpha$ S mice received an intravagal injection of Cre-AAVs together with hM3D<sup>fl</sup>-AAVs and were sacrificed five weeks later. They were also treated with daily intraperitoneal injections of either saline or CNO for two weeks prior to sacrifice. (A) Tissue sections from the medulla oblongata and pons were immunostained with anti-RFP (for the detection of mCherry-tagged hM3D) and processed for brightfield microscopy. Images of representative sections show that robust protein expression characterized cell bodies and neurites in the DMnX, whereas pontine sections were devoid of immunoreactivity. Scale bar, 40  $\mu$ m. (B) Tissue sections from the pons were double-labeled with anti-h- $\alpha$ S (red) and anti-RFP (yellow) and processed for confocal microscopy. Representative images show axons loaded with h- $\alpha$ S as a result of the spreading process. The same axons were devoid of RFP immunoreactivity, further confirming lack of medullary-to-pons transfer of the RFP protein. Scale bar, 10  $\mu$ m.

**Data S1.** All quantitative data used in this manuscript are listed below

**Fiber counts**

**Fig. 2C**

| Sample | Titer (gc/ml) | Pons | cMB | rMB | FB |
|--------|---------------|------|-----|-----|----|
| 1      | 1x10E12       | 10   | 3   | 0   | 0  |
| 2      | 1x10E12       | 2    | 0   | 0   | 0  |
| 3      | 1x10E12       | 3    | 1   | 0   | 0  |
| 4      | 1x10E12       | 2    | 0   | 0   | 0  |
| 1      | 2x10E12       | 10   | 27  | 11  | 1  |
| 2      | 2x10E12       | 41   | 29  | 14  | 2  |
| 3      | 2x10E12       | 24   | 19  | 10  | 0  |
| 4      | 2x10E12       | 32   | 23  | 11  | 2  |
| 5      | 2x10E12       | 40   | 28  | 15  | 1  |
| 1      | 4x10E12       | 46   | 34  | 14  | 2  |
| 2      | 4x10E12       | 59   | 40  | 17  | 3  |
| 3      | 4x10E12       | 81   | 57  | 24  | 7  |
| 4      | 4x10E12       | 52   | 37  | 16  | 3  |
| 5      | 4x10E12       | 66   | 46  | 18  | 5  |

**Fig. 2G**

| Sample | Time point | Pons | cMB | rMB | FB |
|--------|------------|------|-----|-----|----|
| 1      | 4 weeks    | 14   | 5   | 1   | 0  |
| 2      | 4 weeks    | 33   | 25  | 14  | 3  |
| 3      | 4 weeks    | 39   | 27  | 20  | 6  |
| 4      | 4 weeks    | 27   | 19  | 12  | 2  |
| 5      | 4 weeks    | 23   | 17  | 11  | 3  |
| 6      | 4 weeks    | 19   | 7   | 5   | 4  |
| 1      | 5 weeks    | 77   | 63  | 38  | 20 |
| 2      | 5 weeks    | 37   | 28  | 21  | 8  |
| 3      | 5 weeks    | 45   | 32  | 28  | 16 |
| 4      | 5 weeks    | 59   | 39  | 24  | 12 |
| 5      | 5 weeks    | 48   | 29  | 19  | 10 |
| 6      | 5 weeks    | 63   | 44  | 27  | 15 |
| 1      | 6 weeks    | 91   | 81  | 50  | 31 |
| 2      | 6 weeks    | 44   | 30  | 21  | 17 |
| 3      | 6 weeks    | 88   | 73  | 41  | 24 |

|   |         |     |    |    |    |
|---|---------|-----|----|----|----|
| 4 | 6 weeks | 40  | 31 | 24 | 13 |
| 5 | 6 weeks | 105 | 82 | 57 | 35 |

**Fig 3H**

| Sample | Treatment group | Pons | cMB | rMB | FB |
|--------|-----------------|------|-----|-----|----|
| 1      | Saline          | 52   | 44  | 30  | 4  |
| 2      | Saline          | 75   | 52  | 24  | 7  |
| 3      | Saline          | 50   | 39  | 19  | 3  |
| 4      | Saline          | 65   | 50  | 27  | 10 |
| 5      | Saline          | 29   | 21  | 11  | 10 |
| 6      | Saline          | 51   | 37  | 16  | 13 |
| 1      | CNO             | 127  | 99  | 48  | 47 |
| 2      | CNO             | 221  | 154 | 47  | 69 |
| 3      | CNO             | 161  | 101 | 59  | 37 |
| 4      | CNO             | 243  | 163 | 58  | 22 |
| 5      | CNO             | 192  | 87  | 36  | 22 |
| 6      | CNO             | 114  | 38  | 17  | 8  |
| 7      | CNO             | 118  | 63  | 22  | 16 |

**Fig. 7D**

| Sample | Treatment group | Pons | cMB | rMB | FB |
|--------|-----------------|------|-----|-----|----|
| 1      | Saline          | 64   | 49  | 22  | 11 |
| 2      | Saline          | 58   | 27  | 27  | 8  |
| 3      | Saline          | 66   | 45  | 23  | 14 |
| 4      | Saline          | 73   | 42  | 28  | 14 |
| 5      | Saline          | 66   | 37  | 19  | 11 |
| 6      | Saline          | 44   | 32  | 18  | 8  |
| 7      | Saline          | 57   | 35  | 27  | 12 |
| 8      | Saline          | 75   | 46  | 29  | 21 |
| 1      | CNO             | 41   | 22  | 19  | 6  |
| 2      | CNO             | 32   | 27  | 15  | 3  |
| 3      | CNO             | 37   | 23  | 17  | 5  |
| 4      | CNO             | 41   | 28  | 18  | 3  |
| 5      | CNO             | 30   | 19  | 10  | 5  |
| 6      | CNO             | 27   | 18  | 11  | 2  |
| 7      | CNO             | 40   | 27  | 12  | 5  |
| 8      | CNO             | 47   | 29  | 20  | 14 |
| 9      | CNO             | 36   | 24  | 18  | 8  |

|    |     |    |    |    |    |
|----|-----|----|----|----|----|
| 10 | CNO | 39 | 23 | 16 | 10 |
|----|-----|----|----|----|----|

**Fig. 9G**

| Sample | Treatment group | Pons | cMB | rMB | FB |
|--------|-----------------|------|-----|-----|----|
| 1      | Control Saline  | 39   | 26  | 12  | 13 |
| 2      | Control Saline  | 69   | 43  | 22  | 22 |
| 3      | Control Saline  | 54   | 40  | 37  | 21 |
| 4      | Control Saline  | 53   | 40  | 19  | 5  |
| 5      | Control Saline  | 48   | 34  | 17  | 3  |
| 6      | Control Saline  | 60   | 47  | 23  | 7  |
| 7      | Control Saline  | 63   | 50  | 28  | 12 |
| 1      | Control CNO     | 96   | 85  | 26  | 28 |
| 2      | Control CNO     | 87   | 63  | 23  | 35 |
| 3      | Control CNO     | 186  | 93  | 40  | 49 |
| 4      | Control CNO     | 144  | 56  | 29  | 23 |
| 5      | Control CNO     | 51   | 24  | 12  | 21 |
| 6      | Control CNO     | 123  | 83  | 61  | 42 |
| 7      | Control CNO     | 140  | 101 | 52  | 40 |
| 8      | Control CNO     | 138  | 120 | 64  | 48 |
| 9      | Control CNO     | 129  | 104 | 58  | 36 |
| 1      | SOD2 Saline     | 46   | 31  | 19  | 12 |
| 2      | SOD2 Saline     | 96   | 55  | 45  | 42 |
| 3      | SOD2 Saline     | 80   | 57  | 16  | 4  |
| 4      | SOD2 Saline     | 31   | 17  | 9   | 6  |
| 5      | SOD2 Saline     | 60   | 12  | 5   | 5  |
| 6      | SOD2 Saline     | 72   | 49  | 25  | 14 |
| 7      | SOD2 Saline     | 48   | 32  | 19  | 6  |
| 8      | SOD2 Saline     | 39   | 27  | 17  | 4  |
| 9      | SOD2 Saline     | 54   | 37  | 21  | 11 |
| 10     | SOD2 Saline     | 39   | 24  | 17  | 8  |
| 11     | SOD2 Saline     | 57   | 40  | 24  | 13 |
| 12     | SOD2 Saline     | 48   | 27  | 18  | 7  |
| 13     | SOD2 Saline     | 33   | 16  | 13  | 6  |
| 14     | SOD2 Saline     | 44   | 25  | 20  | 8  |
| 1      | SOD2 CNO        | 34   | 24  | 9   | 6  |
| 2      | SOD2 CNO        | 61   | 21  | 16  | 3  |

|    |          |    |    |    |    |
|----|----------|----|----|----|----|
| 3  | SOD2 CNO | 91 | 59 | 19 | 16 |
| 4  | SOD2 CNO | 67 | 47 | 27 | 8  |
| 5  | SOD2 CNO | 63 | 42 | 20 | 9  |
| 6  | SOD2 CNO | 43 | 28 | 14 | 3  |
| 7  | SOD2 CNO | 62 | 32 | 19 | 6  |
| 8  | SOD2 CNO | 58 | 35 | 23 | 12 |
| 9  | SOD2 CNO | 37 | 26 | 13 | 5  |
| 10 | SOD2 CNO | 64 | 40 | 23 | 10 |
| 11 | SOD2 CNO | 33 | 20 | 12 | 5  |
| 12 | SOD2 CNO | 49 | 26 | 15 | 6  |
| 13 | SOD2 CNO | 51 | 33 | 21 | 13 |

## Fiber Length Measurements

**Fig. 2D**

| Sample | Titer                | Length     |
|--------|----------------------|------------|
| 1      | 1 X 10 <sup>12</sup> | 3,32247681 |
| 2      | 1 X 10 <sup>12</sup> | 2,8478374  |
| 3      | 1 X 10 <sup>12</sup> | 2,03416968 |
| 4      | 1 X 10 <sup>12</sup> | 1,62733569 |
| 1      | 2 X 10 <sup>12</sup> | 12,40843   |
| 2      | 2 X 10 <sup>12</sup> | 19,12119   |
| 3      | 2 X 10 <sup>12</sup> | 9,01815    |
| 4      | 2 X 10 <sup>12</sup> | 9,96743    |
| 5      | 2 X 10 <sup>12</sup> | 14,848     |
| 1      | 4 X 10 <sup>12</sup> | 29,49546   |
| 2      | 4 X 10 <sup>12</sup> | 19,12119   |
| 3      | 4 X 10 <sup>12</sup> | 38,85264   |
| 4      | 4 X 10 <sup>12</sup> | 18,51094   |
| 5      | 4 X 10 <sup>12</sup> | 23,59637   |

**Fig. 2H**

| Sample | Time point | Length   |
|--------|------------|----------|
| 1      | 4w         | 9,49279  |
| 2      | 4w         | 12,34063 |



|   |    |            |
|---|----|------------|
| 3 | 4w | 12,81527   |
| 4 | 4w | 6,17031445 |
| 5 | 4w | 6,64495361 |
| 6 | 4w | 5,96567432 |
| 1 | 5w | 17,79898   |
| 2 | 5w | 10,91671   |
| 3 | 5w | 15,18847   |
| 4 | 5w | 17,08702   |
| 5 | 5w | 17,087     |
| 6 | 5w | 21,3588    |
| 1 | 6w | 25,39321   |
| 2 | 6w | 21,5961    |
| 3 | 6w | 33,93673   |
| 4 | 6w | 15,4258    |
| 5 | 6w | 29,4277    |

**Fig. 31**

| Sample | Treatment group | Length   |
|--------|-----------------|----------|
| 1      | Saline          | 8,78083  |
| 2      | Saline          | 13,76455 |
| 3      | Saline          | 51,4984  |
| 4      | Saline          | 41,0563  |
| 5      | Saline          | 11,3913  |
| 6      | Saline          | 16,3751  |
| 1      | CNO             | 47,7013  |
| 2      | CNO             | 63,12706 |
| 3      | CNO             | 36,78457 |
| 4      | CNO             | 62,4151  |
| 5      | CNO             | 43,4295  |
| 6      | CNO             | 25,1559  |
| 7      | CNO             | 38,2085  |

**Fig. 9H**

| Sample | Treatment group | Length   |
|--------|-----------------|----------|
| 1      | Control Saline  | 19,93486 |
| 2      | Control Saline  | 10,20475 |
| 3      | Control Saline  | 7,83155  |
| 4      | Control Saline  | 9,49279  |
| 5      | Control Saline  | 27,29178 |
| 1      | Control CNO     | 63,83902 |
| 2      | Control CNO     | 49,1252  |
| 3      | Control CNO     | 65,50026 |
| 4      | Control CNO     | 43,66684 |
| 5      | Control CNO     | 57,194   |
| 1      | SOD2 Saline     | 17,56166 |
| 2      | SOD2 Saline     | 53,3969  |
| 3      | SOD2 Saline     | 28,47838 |
| 4      | SOD2 Saline     | 7,59423  |
| 5      | SOD2 Saline     | 3,32248  |
| 1      | SOD2 CNO        | 17,79898 |
| 2      | SOD2 CNO        | 12,34063 |
| 3      | SOD2 CNO        | 5,69567  |
| 4      | SOD2 CNO        | 21,35878 |
| 5      | SOD2 CNO        | 9,49279  |

**Fiber Density Measurements****Fig. 2D**

| Sample | Titer                | Density    |
|--------|----------------------|------------|
| 1      | 1 X 10 <sup>12</sup> | 9,92625631 |
| 2      | 1 X 10 <sup>12</sup> | 9,00823821 |
| 3      | 1 X 10 <sup>12</sup> | 6,65698967 |
| 4      | 1 X 10 <sup>12</sup> | 5,45183871 |
| 1      | 2 X 10 <sup>12</sup> | 33,1159927 |
| 2      | 2 X 10 <sup>12</sup> | 64,5669858 |
| 3      | 2 X 10 <sup>12</sup> | 29,5410695 |

|   |                      |            |
|---|----------------------|------------|
| 4 | 2 X 10 <sup>12</sup> | 27,2808213 |
| 5 | 2 X 10 <sup>12</sup> | 50,225453  |
| 1 | 4 X 10 <sup>12</sup> | 93,5416515 |
| 2 | 4 X 10 <sup>12</sup> | 61,4027668 |
| 3 | 4 X 10 <sup>12</sup> | 101,237278 |
| 4 | 4 X 10 <sup>12</sup> | 46,6505544 |
| 5 | 4 X 10 <sup>12</sup> | 54,5992355 |

**Fig. 2H**

| Sample | Time point | Density    |
|--------|------------|------------|
| 1      | 4w         | 31,7398631 |
| 2      | 4w         | 43,1948183 |
| 3      | 4w         | 43,1314852 |
| 4      | 4w         | 20,3368241 |
| 5      | 4w         | 23,2587448 |
| 6      | 4w         | 21,0557175 |
| 1      | 5w         | 64,2546217 |
| 2      | 5w         | 39,186562  |
| 3      | 5w         | 53,7205683 |
| 4      | 5w         | 60,8746241 |
| 5      | 5w         | 58,8107743 |
| 6      | 5w         | 77,5465451 |
| 1      | 6w         | 88,2766161 |
| 2      | 6w         | 70,917796  |
| 3      | 6w         | 110,367298 |
| 4      | 6w         | 49,2953606 |
| 5      | 6w         | 104,911586 |

**Fig. 3I**

| Sample | Treatment group | Density  |
|--------|-----------------|----------|
| 1      | Saline          | 30,29356 |
| 2      | Saline          | 49,62487 |
| 3      | Saline          | 181,5401 |
| 4      | Saline          | 147,8718 |

|   |        |          |
|---|--------|----------|
| 5 | Saline | 42,43834 |
| 6 | Saline | 57,6237  |
| 1 | CNO    | 166,3533 |
| 2 | CNO    | 197,8378 |
| 3 | CNO    | 116,739  |
| 4 | CNO    | 197,3981 |
| 5 | CNO    | 155,2162 |
| 6 | CNO    | 88,48645 |
| 7 | CNO    | 140,2919 |

**Fig. 9I**

| Sample | Treatment group | Treatment |
|--------|-----------------|-----------|
| 1      | Control Saline  | 62,01022  |
| 2      | Control Saline  | 34,51013  |
| 3      | Control Saline  | 26,1299   |
| 4      | Control Saline  | 34,15471  |
| 5      | Control Saline  | 96,1293   |
| 1      | Control CNO     | 224,1468  |
| 2      | Control CNO     | 167,892   |
| 3      | Control CNO     | 262,993   |
| 4      | Control CNO     | 167,254   |
| 5      | Control CNO     | 229,3966  |
| 1      | SOD2 Saline     | 55,83816  |
| 2      | SOD2 Saline     | 168,0115  |
| 3      | SOD2 Saline     | 109,6157  |
| 4      | SOD2 Saline     | 28,84502  |
| 5      | SOD2 Saline     | 11,27526  |
| 1      | SOD2 CNO        | 56,88156  |
| 2      | SOD2 CNO        | 44,84469  |
| 3      | SOD2 CNO        | 19,78838  |
| 4      | SOD2 CNO        | 76,04995  |
| 5      | SOD2 CNO        | 33,09114  |

## Stereological analyses

**Fig. 4D**

| Sample | Treatment group | Number of dots |
|--------|-----------------|----------------|
| 1      | Saline          | 177,108992     |
| 2      | Saline          | 169,612767     |
| 3      | Saline          | 73,9310328     |
| 4      | Saline          | 57,7634789     |
| 5      | Saline          | 65,5166005     |
| 6      | Saline          | 56,0624819     |
| 1      | CNO             | 357,277127     |
| 2      | CNO             | 417,724325     |
| 3      | CNO             | 608,093941     |
| 4      | CNO             | 299,67733      |
| 5      | CNO             | 243,07584      |
| 6      | CNO             | 366,857371     |
| 7      | CNO             | 310,503678     |

**Fig. 4E**

| Sample | Treatment group | Number of dots |
|--------|-----------------|----------------|
| 1      | Saline          | 62,2578819     |
| 2      | Saline          | 117,191282     |
| 3      | Saline          | 135,502433     |
| 4      | Saline          | 111,697948     |
| 5      | Saline          | 93,9971964     |
| 6      | Saline          | 79,3482861     |
| 1      | CNO             | 236,824111     |
| 2      | CNO             | 164,800254     |
| 3      | CNO             | 235,603364     |
| 4      | CNO             | 261,849344     |
| 5      | CNO             | 95,2179433     |
| 6      | CNO             | 178,838817     |
| 7      | CNO             | 285,65383      |

**Fig. 7C**

| Sample | Treatment group | Number of dots |
|--------|-----------------|----------------|
| 1      | Saline          | 158,643626     |
| 2      | Saline          | 75,5636038     |
| 3      | Saline          | 109,27173      |

|   |        |            |
|---|--------|------------|
| 4 | Saline | 137,342732 |
| 5 | Saline | 67,4083023 |
| 6 | Saline | 51,7663148 |
| 1 | CNO    | 39,048134  |
| 2 | CNO    | 53,5525662 |
| 3 | CNO    | 55,9393281 |
| 4 | CNO    | 58,1142039 |
| 5 | CNO    | 52,7223027 |
| 6 | CNO    | 62,4465715 |

**Fig. 9E**

| Sample | Treatment group | Number of dots |
|--------|-----------------|----------------|
| 1      | Control Saline  | 101,679431     |
| 2      | Control Saline  | 99,0743688     |
| 3      | Control Saline  | 89,0996803     |
| 4      | Control Saline  | 110,128123     |
| 5      | Control Saline  | 100,001524     |
| 1      | Control CNO     | 203,379151     |
| 2      | Control CNO     | 178,807946     |
| 3      | Control CNO     | 327,408768     |
| 4      | Control CNO     | 152,378042     |
| 5      | Control CNO     | 193,347052     |
| 1      | SOD2 Saline     | 95,2510716     |
| 2      | SOD2 Saline     | 80,5941825     |
| 3      | SOD2 Saline     | 87,386634      |
| 4      | SOD2 Saline     | 89,8578324     |
| 5      | SOD2 Saline     | 90,4148221     |
| 6      | SOD2 Saline     | 132,345112     |
| 1      | SOD2 CNO        | 32,5454378     |
| 2      | SOD2 CNO        | 66,8625842     |
| 3      | SOD2 CNO        | 100,063097     |
| 4      | SOD2 CNO        | 69,5996053     |
| 5      | SOD2 CNO        | 127,759641     |
| 6      | SOD2 CNO        | 154,851165     |

**Fig. 9F**

| Sample | Treatment group | Number of dots |
|--------|-----------------|----------------|
| 1      | Control Saline  | 144,658236     |
| 2      | Control Saline  | 70,3581021     |

|   |                |            |
|---|----------------|------------|
| 3 | Control Saline | 34,1383169 |
| 4 | Control Saline | 19,4717995 |
| 5 | Control Saline | 231,348926 |
| 1 | Control CNO    | 353,872202 |
| 2 | Control CNO    | 204,022158 |
| 3 | Control CNO    | 559,159803 |
| 4 | Control CNO    | 451,208594 |
| 5 | Control CNO    | 174,854521 |
| 1 | SOD2 Saline    | 74,1568935 |
| 2 | SOD2 Saline    | 198,970457 |
| 3 | SOD2 Saline    | 74,1568935 |
| 4 | SOD2 Saline    | 77,4355416 |
| 5 | SOD2 Saline    | 179,017681 |
| 1 | SOD2 CNO       | 163,458594 |
| 2 | SOD2 CNO       | 68,6929275 |
| 3 | SOD2 CNO       | 166,591987 |
| 4 | SOD2 CNO       | 98,1797225 |
| 5 | SOD2 CNO       | 114,368845 |

**Fig. 10D**

| Sample | Treatment group | Number of dots |
|--------|-----------------|----------------|
| 1      | Saline          | 102,371429     |
| 2      | Saline          | 31,8105263     |
| 3      | Saline          | 172,353885     |
| 4      | Saline          | 21,3994987     |
| 5      | Saline          | 172,030075     |
| 1      | CNO             | 273,568421     |
| 2      | CNO             | 277,617043     |
| 3      | CNO             | 427,992982     |
| 4      | CNO             | 198,814536     |
| 5      | CNO             | 216,309774     |

**Fig. 10E**

| Sample | Treatment group | Number of dots |
|--------|-----------------|----------------|
| 1      | Control Saline  | 158,807517     |
| 2      | Control Saline  | 60,944642      |
| 3      | Control Saline  | 24,0264093     |
| 4      | Control Saline  | 141,813611     |
| 5      | Control Saline  | 114,271204     |

|   |             |            |
|---|-------------|------------|
| 1 | Control CNO | 600,070086 |
| 2 | Control CNO | 471,930422 |
| 3 | Control CNO | 302,118842 |
| 4 | Control CNO | 280,241239 |
| 5 | Control CNO | 303,160488 |
| 1 | SOD2 Saline | 213,566785 |
| 2 | SOD2 Saline | 184,396648 |
| 3 | SOD2 Saline | 117,722194 |
| 4 | SOD2 Saline | 177,104114 |
| 5 | SOD2 Saline | 173,978669 |
| 1 | SOD2 CNO    | 138,558151 |
| 2 | SOD2 CNO    | 55,2148299 |
| 3 | SOD2 CNO    | 70,8415439 |
| 4 | SOD2 CNO    | 83,3433215 |
| 5 | SOD2 CNO    | 71,8831894 |

### Brightfield staining density measurements

**Fig. 3F**

| Sample | Treatment group | integrated density |
|--------|-----------------|--------------------|
| 1      | Saline          | 87,04653           |
| 2      | Saline          | 115,2659           |
| 3      | Saline          | 97,68753           |
| 4      | Saline          | 139,9699           |
| 5      | Saline          | 97,55126           |
| 6      | Saline          | 101,4426           |
| 7      | Saline          | 109,4317           |
| 8      | Saline          | 51,60461           |
| 1      | CNO             | 265,6267           |
| 2      | CNO             | 233,2854           |
| 3      | CNO             | 218,0514           |
| 4      | CNO             | 294,8751           |
| 5      | CNO             | 133,4128           |
| 6      | CNO             | 159,9978           |
| 7      | CNO             | 154,8667           |
| 8      | CNO             | 278,9642           |



**Fig. 8C**

| Sample | Treatment group | integrated density |
|--------|-----------------|--------------------|
| 1      | Control         | 103,228072         |
| 2      | Control         | 98,9160815         |
| 3      | Control         | 91,3175991         |
| 4      | Control         | 117,054479         |
| 5      | Control         | 89,4837573         |
| 6      | Control         | 89,1138157         |
| 7      | Control         | 105,279905         |
| 8      | Control         | 99,0177411         |
| 9      | Control         | 102,31727          |
| 10     | Control         | 95,9042037         |
| 1      | SOD2            | 104,265236         |
| 2      | SOD2            | 117,878433         |
| 3      | SOD2            | 103,152025         |
| 4      | SOD2            | 105,279905         |
| 5      | SOD2            | 104,343983         |
| 6      | SOD2            | 109,511216         |
| 7      | SOD2            | 102,363426         |
| 8      | SOD2            | 115,553792         |
| 9      | SOD2            | 82,1200038         |
| 10     | SOD2            | 92,5926079         |

**Fig. 8D**

| Sample | Treatment group | integrated density |
|--------|-----------------|--------------------|
| 1      | Control         | 88,9260299         |
| 2      | Control         | 101,218006         |
| 3      | Control         | 98,8399137         |
| 4      | Control         | 116,502561         |
| 5      | Control         | 129,319466         |
| 6      | Control         | 95,4460325         |
| 7      | Control         | 115,239133         |
| 8      | Control         | 87,1916222         |
| 9      | Control         | 89,4146749         |
| 10     | Control         | 92,9897269         |
| 11     | Control         | 84,9128343         |
| 1      | SOD2            | 93,6235921         |
| 2      | SOD2            | 105,692997         |

|   |      |            |
|---|------|------------|
| 3 | SOD2 | 110,671263 |
| 4 | SOD2 | 88,5047946 |
| 5 | SOD2 | 93,1581006 |
| 6 | SOD2 | 103,096811 |
| 7 | SOD2 | 110,507521 |
| 8 | SOD2 | 81,0403989 |

## Fluorescent intensity measurements and fluorescent PLA dot counts

**Fig. 4B**

| Sample | Treatment group | Intensity  |
|--------|-----------------|------------|
| 1      | Saline          | 129,13253  |
| 2      | Saline          | 123,99547  |
| 3      | Saline          | 80,6987952 |
| 4      | Saline          | 102,494217 |
| 5      | Saline          | 63,6056867 |
| 6      | Saline          | 94,1359879 |
| 7      | Saline          | 102,041255 |
| 8      | Saline          | 103,823477 |
| 1      | CNO             | 228,878602 |
| 2      | CNO             | 278,102554 |
| 3      | CNO             | 269,255711 |
| 4      | CNO             | 384,720048 |
| 5      | CNO             | 134,893853 |
| 6      | CNO             | 101,581819 |
| 7      | CNO             | 123,308874 |

**Fig. 5B**

| Sample | Treatment group | Intensity  |
|--------|-----------------|------------|
| 1      | Saline          | 74,067086  |
| 2      | Saline          | 57,7987421 |
| 3      | Saline          | 149,119497 |
| 4      | Saline          | 16,0377358 |
| 5      | Saline          | 202,93501  |
| 1      | CNO             | 1035,01048 |
| 2      | CNO             | 2618,44864 |
| 3      | CNO             | 1925,36688 |

|   |     |            |
|---|-----|------------|
| 4 | CNO | 581,132075 |
| 5 | CNO | 727,044025 |

**Fig. 5B**

| Sample | Treatment group | Number of dots |
|--------|-----------------|----------------|
| 1      | Saline          | 134,433962     |
| 2      | Saline          | 77,186964      |
| 3      | Saline          | 114,255765     |
| 4      | Saline          | 34,067086      |
| 5      | Saline          | 139,937107     |
| 1      | CNO             | 365,566038     |
| 2      | CNO             | 1283,85744     |
| 3      | CNO             | 592,243187     |
| 4      | CNO             | 315,674891     |
| 5      | CNO             | 275,943396     |

**Fig. 5D**

| Sample | Treatment group | Intensity   |
|--------|-----------------|-------------|
| 1      | Saline          | 155,7350888 |
| 2      | Saline          | 211,8442051 |
| 3      | Saline          | 55,78495911 |
| 4      | Saline          | 43,20766008 |
| 5      | Saline          | 33,42309994 |
| 1      | CNO             | 381,4083383 |
| 2      | CNO             | 241,8112906 |
| 3      | CNO             | 1173,583682 |
| 4      | CNO             | 443,5816876 |
| 5      | CNO             | 302,5234391 |

**Fig. 5D**

| Sample | Treatment group | Number of dots |
|--------|-----------------|----------------|
| 1      | Saline          | 167,5          |
| 2      | Saline          | 119,15         |
| 3      | Saline          | 72,2           |
| 4      | Saline          | 82,75          |
| 5      | Saline          | 55,9           |
| 1      | CNO             | 259,6          |
| 2      | CNO             | 242,35         |

|   |     |        |
|---|-----|--------|
| 3 | CNO | 391,1  |
| 4 | CNO | 162,5  |
| 5 | CNO | 130,45 |

**Fig. 6C**

| Sample | Treatment group | Intensity  |
|--------|-----------------|------------|
| 1      | Saline          | 81,7274648 |
| 2      | Saline          | 66,0387324 |
| 3      | Saline          | 111,778169 |
| 4      | Saline          | 101,198592 |
| 5      | Saline          | 138,264789 |
| 1      | CNO             | 102,117254 |
| 2      | CNO             | 161,800704 |
| 3      | CNO             | 160,262676 |
| 4      | CNO             | 159,340845 |
| 5      | CNO             | 242,756338 |

**Fig. 9B**

| Sample | Treatment group | Intensity  |
|--------|-----------------|------------|
| 1      | Control Saline  | 171,387496 |
| 2      | Control Saline  | 81,7740716 |
| 3      | Control Saline  | 75,2463853 |
| 4      | Control Saline  | 26,5809012 |
| 5      | Control Saline  | 145,014663 |
| 1      | Control CNO     | 258,468797 |
| 2      | Control CNO     | 945,74203  |
| 3      | Control CNO     | 497,646619 |
| 4      | Control CNO     | 271,844141 |
| 5      | Control CNO     | 195,531469 |
| 1      | SOD2 Saline     | 62,8872663 |
| 2      | SOD2 Saline     | 82,0986029 |
| 3      | SOD2 Saline     | 38,7405619 |
| 4      | SOD2 Saline     | 68,9561846 |
| 5      | SOD2 Saline     | 199,674063 |
| 1      | SOD2 CNO        | 70,6550362 |
| 2      | SOD2 CNO        | 142,486622 |
| 3      | SOD2 CNO        | 31,426377  |
| 4      | SOD2 CNO        | 28,6442104 |

|   |          |            |
|---|----------|------------|
| 5 | SOD2 CNO | 20,6106905 |
|---|----------|------------|

**Fig. 9C**

| Sample | Treatment group | Intensity  |
|--------|-----------------|------------|
| 1      | Control Saline  | 140,379185 |
| 2      | Control Saline  | 83,0307919 |
| 3      | Control Saline  | 87,4008338 |
| 4      | Control Saline  | 64,5421541 |
| 5      | Control Saline  | 124,714267 |
| 1      | Control CNO     | 143,875219 |
| 2      | Control CNO     | 232,889606 |
| 3      | Control CNO     | 186,179291 |
| 4      | Control CNO     | 111,604142 |
| 5      | Control CNO     | 262,5128   |
| 1      | SOD2 Saline     | 121,419927 |
| 2      | SOD2 Saline     | 105,811897 |
| 3      | SOD2 Saline     | 68,5760387 |
| 4      | SOD2 Saline     | 90,3590157 |
| 5      | SOD2 Saline     | 182,965482 |
| 1      | SOD2 CNO        | 133,738791 |
| 2      | SOD2 CNO        | 119,154746 |
| 3      | SOD2 CNO        | 72,2065349 |
| 4      | SOD2 CNO        | 58,3568645 |
| 5      | SOD2 CNO        | 31,4643001 |

**Fig. 10C**

| Sample | Treatment | Intensity  |
|--------|-----------|------------|
| 1      | Saline    | 121,517885 |
| 2      | Saline    | 88,4460215 |
| 3      | Saline    | 148,354608 |
| 4      | Saline    | 45,0273978 |
| 1      | CNO       | 147,455072 |
| 2      | CNO       | 169,39871  |
| 3      | CNO       | 196,789355 |
| 4      | CNO       | 177,61772  |
| 5      | CNO       | 123,704839 |

## qPCR analyses

### 2- $\Delta\Delta$ CT $\alpha$ -syn / Hprt Fig. 8B

| Sample | Treatment group | 2- $\Delta\Delta$ CT |
|--------|-----------------|----------------------|
| 1      | Control         | 0,59                 |
| 2      | Control         | 1,26                 |
| 3      | Control         | 1,13                 |
| 4      | Control         | 0,75                 |
| 5      | Control         | 0,71                 |
| 6      | Control         | 1,28                 |
| 7      | Control         | 1,87                 |
| 8      | Control         | 0,92                 |
| 1      | SOD2            | 1,42                 |
| 2      | SOD2            | 1,3                  |
| 3      | SOD2            | 0,8                  |
| 4      | SOD2            | 0,82                 |
| 5      | SOD2            | 0,73                 |
| 6      | SOD2            | 2,26                 |

### 2- $\Delta\Delta$ CT $\alpha$ -syn / Hprt Fig. 8B

| Sample | Treatment group | 2- $\Delta\Delta$ CT |
|--------|-----------------|----------------------|
| 1      | Control         | 0,81                 |
| 2      | Control         | 0,9                  |
| 3      | Control         | 1,14                 |
| 4      | Control         | 1,2                  |
| 5      | Control         | 0,81                 |
| 6      | Control         | 0,92                 |
| 7      | Control         | 1,07                 |
| 8      | Control         | 1,26                 |
| 1      | SOD2            | 1,17                 |
| 2      | SOD2            | 1,11                 |
| 3      | SOD2            | 1,09                 |
| 4      | SOD2            | 1,17                 |
| 5      | SOD2            | 1,05                 |
| 6      | SOD2            | 1,14                 |

### 2- $\Delta\Delta$ CT $\alpha$ -syn / Hprt Fig. 8B

| Sample | Treatment group | 2- $\Delta\Delta$ CT |
|--------|-----------------|----------------------|
| 1      | Control         | 0,71                 |

|   |         |      |
|---|---------|------|
| 2 | Control | 0,95 |
| 3 | Control | 1,1  |
| 4 | Control | 1,22 |
| 5 | Control | 0,73 |
| 6 | Control | 1,08 |
| 7 | Control | 1,15 |
| 8 | Control | 1,21 |
| 1 | SOD2    | 1,2  |
| 2 | SOD2    | 1,17 |
| 3 | SOD2    | 0,91 |
| 4 | SOD2    | 1,34 |
| 5 | SOD2    | 1,02 |
| 6 | SOD2    | 1,44 |
